# Supplementary material
Source: PubMed Central journal article supplement (PMC8648746)
Supplement: 41422_2021_578_MOESM1_ESM.pdf [file 41422_2021_578_MOESM1_ESM.pdf]

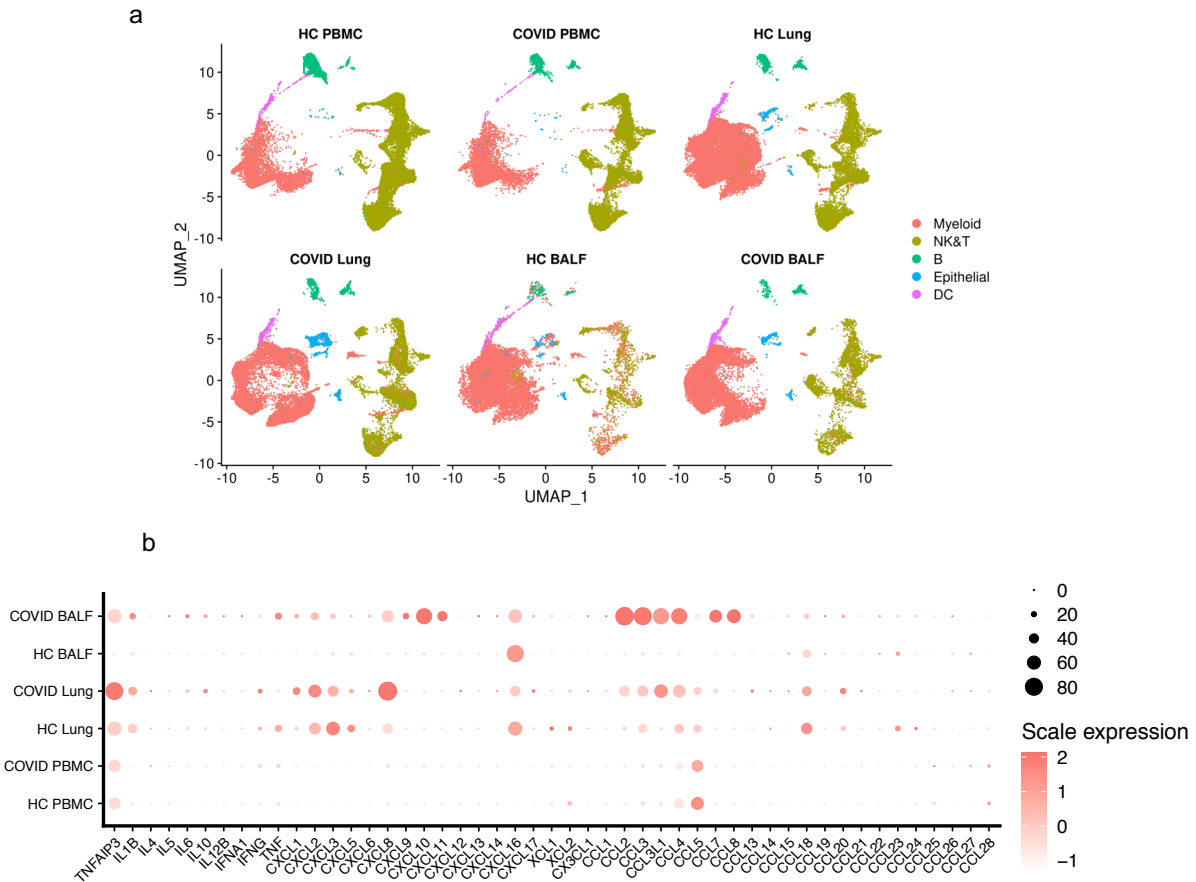

**Figure S1 Strong induction of inflammatory response in the lung of severe COVID-19.**

**a-b.** The single-cell sequencing data of 1 PBMC, 3 BALF, and 4 lung tissues from patient 1 and 3 control PBMCs, 3 control BALFs, 3 control lungs were integrated, 143,015 cells were obtained and divided into myeloid cells, NK & T cells, B cells, dendritic cells (DC) and epithelial cells according to specific markers (**a**). The heatmap shows the expression of indicated cytokines and chemokines in the patient and controls (**b**).
