# Supplementary material
Source: PubMed Central journal article supplement (PMC8648746)
Supplement: 41422_2021_578_MOESM2_ESM.pdf [file 41422_2021_578_MOESM2_ESM.pdf]

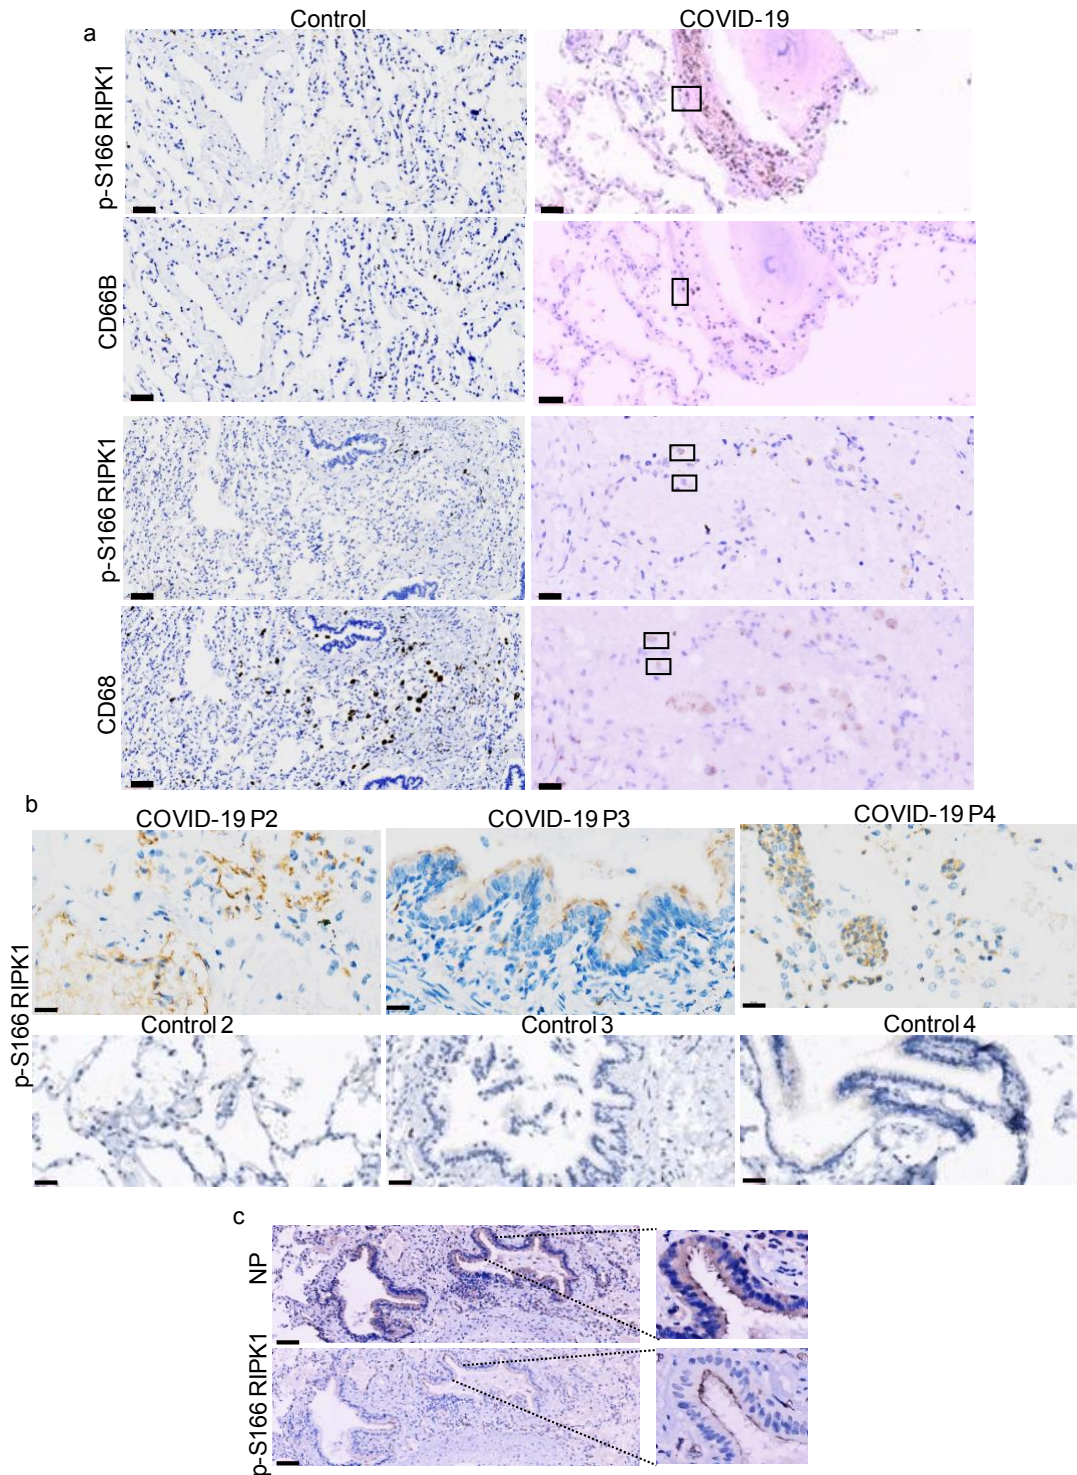

**Figure S2 Activation of RIPK1 in severe COVID-19.**

**a.** RIPK1 was activated in the neutrophils and macrophages in the lungs of severe COVID-19. The macrophage marker CD68, neutrophil marker CD66B and activated RIPK1 (p-S166 RIPK1) were

analyzed by immunohistochemistry on serial sections of severe COVID-19 and controls. Scale bars: 40  $\mu\text{m}$ .

**b.** Immunohistochemistry of p-S166 RIPK1 in the lungs of 3 severe COVID-19 patients and 3 age-matched controls. Scale bars: 20  $\mu\text{m}$ .

**c.** Activated RIPK1 in the SARS-CoV-2-infected ciliated bronchial epithelial cells. Immunohistochemistry staining of viral protein NP and p-S166 RIPK1 in the lungs of severe COVID-19 in adjacent consecutive serial sections. Scale bars: 20  $\mu\text{m}$ . The enlarged photos show the bronchial area (right).
