# Supplementary material
Source: PubMed Central journal article supplement (PMC8648746)
Supplement: 41422_2021_578_MOESM3_ESM.pdf [file 41422_2021_578_MOESM3_ESM.pdf]

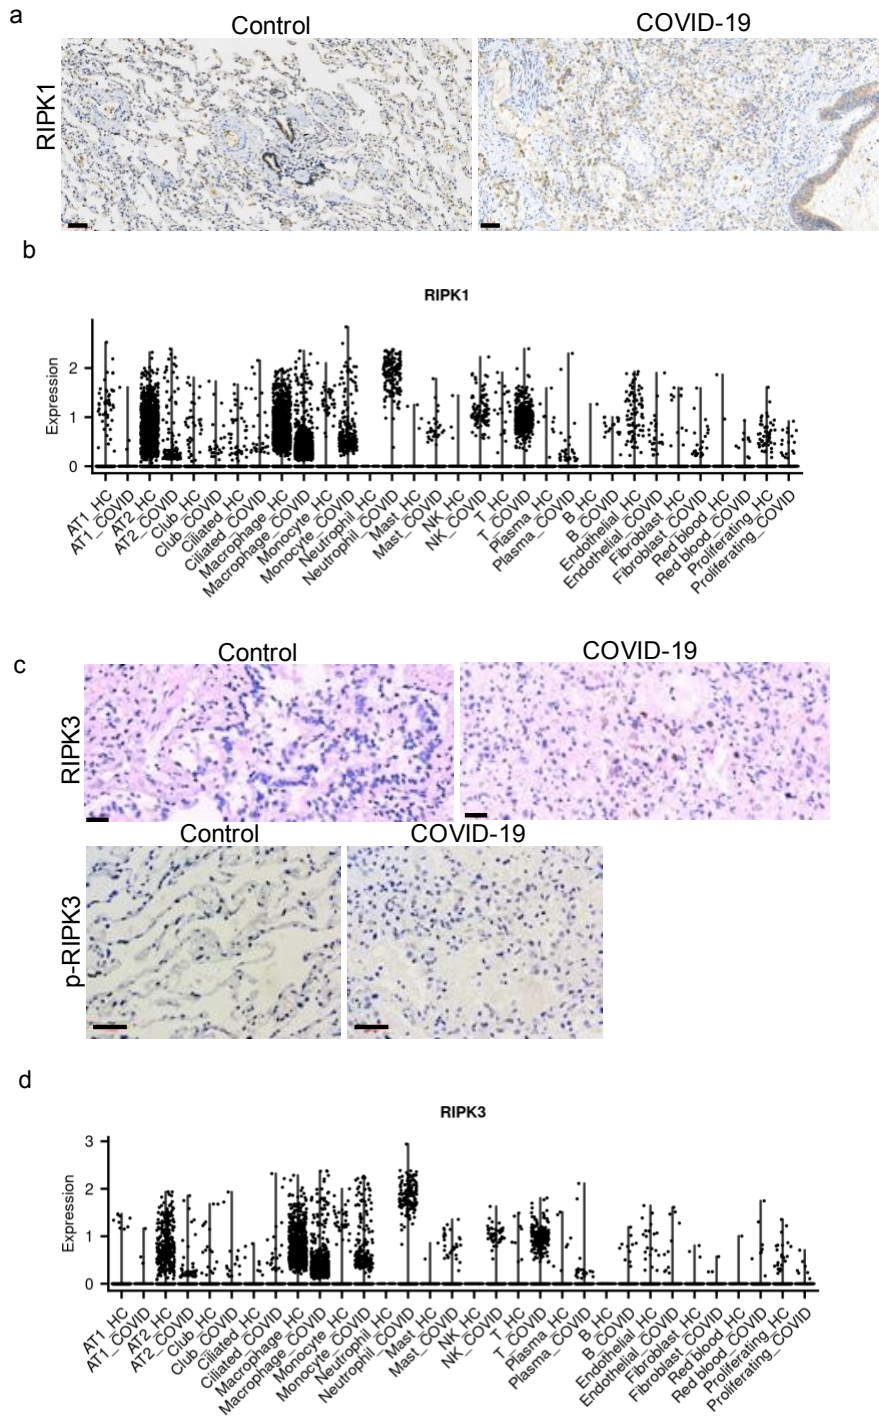

**Figure S3 The expression of RIPK1 and RIPK3 in the lungs of control and COVID-19.**

**a-b.** IHC (**a**) and scRNAseq analysis (**b**) of RIPK1 expression in the lungs from control and COVID-19 patients. Scale bars: 80  $\mu$ m

**c-d.** Immunohistochemistry of RIPK3 (Scale bars: 20  $\mu$ m) and p-RIPK3 (scale bars: 1 inch) in lung of severe COVID-19 patients and age-matched control (**c**). scRNA-seq analysis of RIPK3 expression in the lungs (**d**).
