# Supplementary material
Source: PubMed Central journal article supplement (PMC8648746)
Supplement: 41422_2021_578_MOESM4_ESM.pdf [file 41422_2021_578_MOESM4_ESM.pdf]

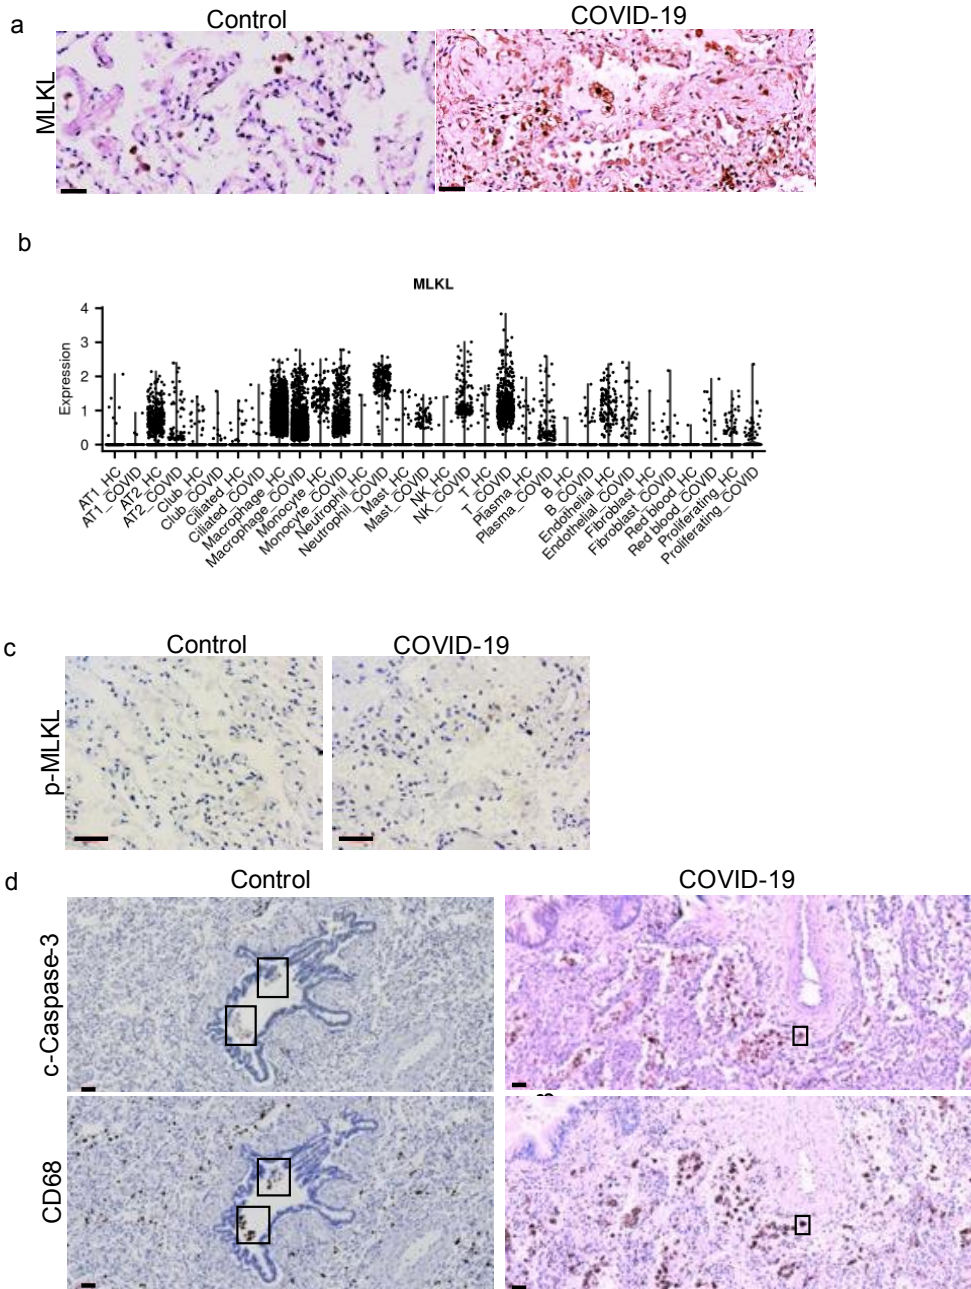

**Figure S4 The expression of MLKL in the lungs of control and COVID-19**

**a-b.** IHC (**a**) and scRNA-seq analysis (**b**) of MLKL expression in the lungs of control and COVID-19. Scale bars: 20  $\mu$ m.

**c.** IHC of p-MLKL in lung of COVID-19 patient and age-matched control. Scale bars: 1 inch.

**d.** CD68 and c-casp3 immunohistochemical staining in the adjacent serial sections of lungs of patients and controls. Scale bars: 100  $\mu\text{m}$ .
