# Supplementary material
Source: PubMed Central journal article supplement (PMC8648746)
Supplement: 41422_2021_578_MOESM5_ESM.pdf [file 41422_2021_578_MOESM5_ESM.pdf]

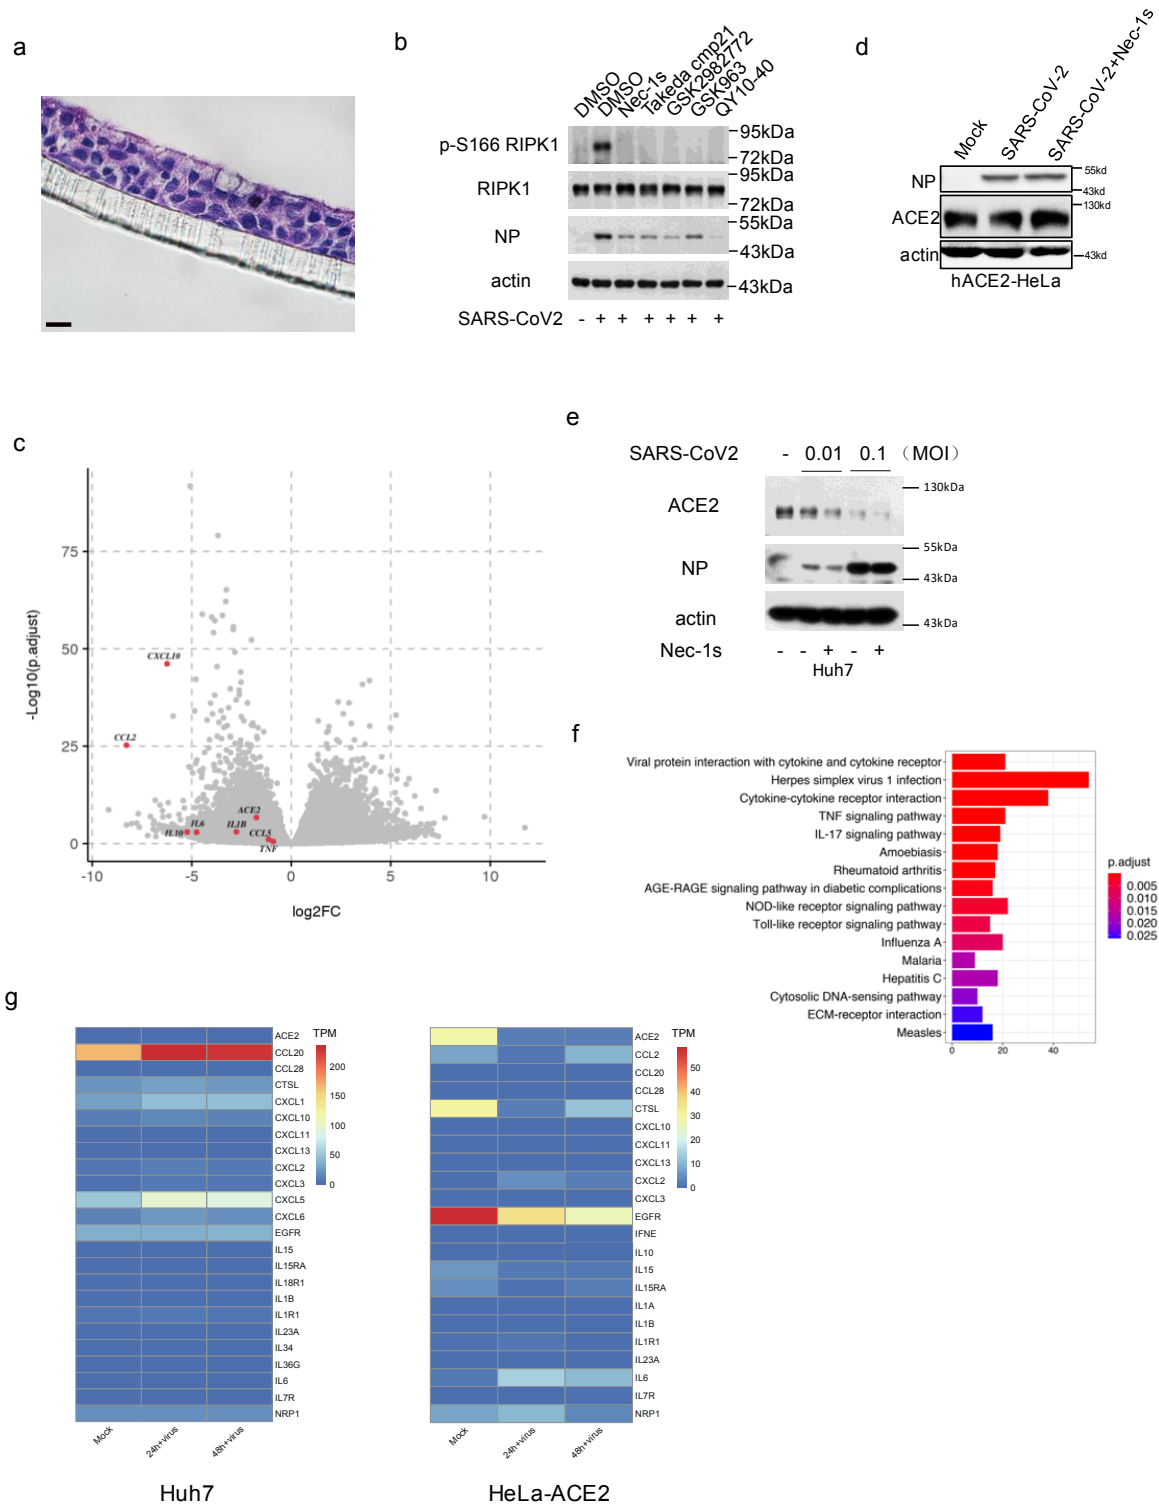

**Figure S5 RIPK1 regulates the expression of ACE2 and proinflammatory cytokines in human lung organoids infected by SARS-CoV-2.**

- a.** H&E staining of the human lung organoid to show ciliated epithelial cells in the superficial layer of the organoids. Scale bar: 100 pixels.
- b.** Lung organoids were first infected with SARS-CoV-2 at the MOI of 1 for 2 h, washed with PBS and replaced with fresh media with 10 $\mu$ M indicated RIPK1 inhibitors or vehicle and incubated for additional 48h. The cell lysates were analyzed by western blotting using indicated antibodies.
- c.** Volcano plot shows the differential gene expression in the human lung organoids infected by SARS-CoV-2+vehicle for 48h and SARS-CoV-2+Nec-1s for 48h. ACE2 and some of the inflammation association genes were marked.
- d.** HeLa-ACE2 cells were first infected with SARS-CoV-2 at the MOI of 1 for 2 h, washed with PBS and replaced with fresh media with 10 $\mu$ M RIPK1 inhibitors Nec-1s or vehicle and incubated for additional 48h. The cell lysates were analyzed by western blotting using indicated antibodies.
- e.** Huh7 cells were first infected with SARS-CoV-2 at the MOI of 0.01 or 0.1 for 2 h, washed with PBS and replaced with fresh media with 10 $\mu$ M RIPK1 inhibitors Nec-1s or vehicle and incubated for additional 48h. The cell lysates were analyzed by western blotting using indicated antibodies.
- f.** Enrichment of GO biological process (BP) terms for up-regulated genes in SARS-CoV-2-48h group compared to that of SARS-CoV-2+Nec-1s-48h group in the organoids treated as in **(b)**. (adjust  $P$  value  $< 0.05$  and absolute  $\log_2FC > 2$ ).
- g.** The heatmaps show inflammation-related genes that were not induced in SARS-CoV-2 infection Huh7 cells or HeLa-ACE2 cells.
