# Supplementary material
Source: PubMed Central journal article supplement (PMC8648746)
Supplement: 41422_2021_578_MOESM8_ESM.pdf [file 41422_2021_578_MOESM8_ESM.pdf]

## Supplementary information

**Table S1. Clinical data of the enrolled COVID-19 patients and healthy controls examined.**

| Sample number               | P1                 | P2                 | P3                                                              | P4                 | Control 1    | Control 2    | Control 3    | Control 4    |
|-----------------------------|--------------------|--------------------|-----------------------------------------------------------------|--------------------|--------------|--------------|--------------|--------------|
| SARS-CoV2                   | +                  | +                  | +                                                               | +                  | -            | -            | -            | -            |
| Severity                    | Severe             | Severe             | Severe                                                          | Severe             |              |              |              |              |
| Age                         | 66                 | 53                 | 86                                                              | 51                 | 66           | 67           | 44           | 62           |
| Gender                      | M                  | F                  | F                                                               | M                  | F            | M            | F            | F            |
| First symptom at onset      | Fever              | Fever, dyspnea     | Fever, cough                                                    | Fever              |              |              |              |              |
| Hospitalization durations   | 37d                | 22d                | 5d                                                              | 6d                 |              |              |              |              |
| Other chronic basic disease | Hyperpression      | NA                 | Atherosclerosis (IV) Heart failure, renal failure, hypertension | Hypertension       |              |              |              |              |
| Influenza A virus           | (-)                | (-)                | (-)                                                             | (-)                |              |              |              |              |
| Influenza B virus           | (-)                | (-)                | (-)                                                             | (-)                |              |              |              |              |
| Respiratory syncytial virus | (-)                | (-)                | (-)                                                             | (-)                |              |              |              |              |
| Interferon atomization      | √                  | √                  | √                                                               | √                  |              |              |              |              |
| Ribavirin                   | √                  | √                  | ×                                                               | ×                  |              |              |              |              |
| Methylprednisolone          | √                  | √                  | √                                                               | √                  |              |              |              |              |
| CT finding                  | Bilaeral pneumonia | Bilaeral pneumonia | Bilaeral pneumonia                                              | Bilaeral pneumonia | Not detected | Not detected | Not detected | Not detected |
