# Supplementary material
Source: PubMed Central journal article supplement (PMC8648746)
Supplement: 41422_2021_578_MOESM9_ESM.pdf [file 41422_2021_578_MOESM9_ESM.pdf]

**Table S2. List of RT-qPCR primers used in this study.**

| Gene             | Site    | Primer                    |
|------------------|---------|---------------------------|
| SARS-CoV2(Spike) | Foward  | TGCAGGTATATGCGCTAGTTATCAG |
|                  | Reverse | CACCAAGTGACATAGTGTAGGCAAT |
| human ACE2       | Foward  | GGAGTTGTGATGGGAGTGAT      |
|                  | Reverse | GATGGAGGCATAAGGATTTT      |
| human CCL2       | Foward  | CAGCCAGATGCAATCAATGCC     |
|                  | Reverse | TGGAATCCTGAACCCACTTCT     |
| human CCL4       | Foward  | CTGTGCTGATCCCAGTGAATC     |
|                  | Reverse | TCAGTTCAGTTCAGGTCATAC     |
| human TNF        | Foward  | CTCTTCTGCCTGCTGCACTTTG    |
|                  | Reverse | ATGGGCTACAGGCTTGTCACTC    |
| human IL6        | Foward  | CCAGCTATGAACTCCTTCTC      |
|                  | Reverse | GCTTGTTCCCTCACATCTCTC     |
| human IFNB1      | Foward  | CTTGATTCCCTACAAAGAAGCAGC  |
|                  | Reverse | TCCTCCTTCTGGAAGTCTGCA     |
| human CXCL10     | Foward  | GGTGAGAAGAGATGTCTGAATCC   |
|                  | Reverse | GTCCATCCTTGGAAAGCACTGCA   |
| human GAPDH      | Foward  | GGAGCGAGATCCCTCCAAAAT     |
|                  | Reverse | GGCTGTTGTCATACTTCTCATG    |
| human EGFR       | Foward  | GGCACGAGTAACAAGCTCAC      |
|                  | Reverse | ATGAGGACATAACCAGCCACC     |
| mice GAPDH       | Foward  | CAGGAGAGTGTTTCCTCGTCC     |
|                  | Reverse | TTCCCATTCCTCGGCCTTGAC     |
| mice TNF         | Foward  | ACCCTCACACTCACAAACCA      |
|                  | Reverse | ATAGCAAATCGGCTGACGGT      |
| mice IL6         | Foward  | GCCTTCTTGGGACTGATGCT      |
|                  | Reverse | TGTGACTCCAGCTTATCTCTTGG   |
| mice CCL4        | Foward  | TGTGCAAACCTAACCCCGAG      |
|                  | Reverse | GGGTCAGAGCCCATTTGGTG      |
| mice IFNA4       | Foward  | TGGCTAGGCTCTGTGCTTTC      |
|                  | Reverse | CTTCAGGCAGGAAAGAGGGG      |
