# Supplementary material
Source: PubMed Central journal article supplement (PMC8648746)
Supplement: 41422_2021_578_MOESM12_ESM.pdf [file 41422_2021_578_MOESM12_ESM.pdf]

### **Legends of Supplementary Videos**

Video S1: The video records the behavior of mice treated with CMC control after intranasal infected with SARS-CoV-2 on the third day.

Video S2: The video records the behavior of mice treated with Nec-1s after intranasal infected with SARS-CoV-2 on the third day.
